# Supplementary material
Source: ML conference proceedings conference paper supplement (https://openaccess.thecvf.com/content/ICCV2025/html/Herbreteau_Self-Calibrated_Variance-Stabilizing_Transformations_ICCV_2025_paper.html)
Supplement: Supplementary file 1 [file Herbreteau_Self-Calibrated_Variance-Stabilizing_Transformations_ICCV_2025_supplemental.pdf]

# Supplementary Material for Self-Calibrated Variance-Stabilizing Transformations for Real-World Image Denoising

## A. More results on removal of synthetic and real-world noise

|                               | Method                        | KODAK               | BSD300             | SET14              |
|-------------------------------|-------------------------------|---------------------|--------------------|--------------------|
| Gaussian $\sigma = 25$        | Baseline, N2C [29]            | 32.91/0.896         | 31.33/0.892        | 31.93/0.878        |
|                               | CBM3D [5]                     | 31.87/0.868         | 30.48/0.861        | 30.88/0.854        |
|                               | N2V [13]                      | 31.81/0.875         | 30.52/0.870        | 30.53/0.853        |
|                               | Nr2N [17]                     | 30.45/0.811         | 29.34/0.803        | 29.75/0.815        |
|                               | ZS-N2N [16]                   | 29.87/0.797         | 28.93/0.800        | 28.97/0.789        |
|                               | S2S [20]                      | 31.28/0.864         | 29.86/0.849        | 30.08/0.839        |
|                               | DBSN [23]                     | 31.64/0.856         | 29.80/0.839        | 30.63/0.846        |
|                               | SSDN [14]                     | 32.40/0.883         | 30.99/0.877        | 31.36/0.866        |
|                               | R2R [18]                      | 32.25/0.880         | 30.91/0.872        | 31.32/0.865        |
|                               | NBR2NBR [11]                  | 32.08/0.879         | 30.79/0.873        | 31.09/0.864        |
|                               | B2UNB [22]                    | 32.27/0.880         | 30.87/0.872        | 31.27/0.864        |
|                               | DCD-Net [32]                  | 32.27/0.881         | 31.01/0.876        | 31.29/0.862        |
|                               | SST-GP [24]                   | 32.75/ <b>0.898</b> | 31.18/0.880        | 31.68/0.872        |
|                               | Noise2VST (ours)              | <b>32.85/0.895</b>  | <b>31.28/0.891</b> | <b>31.82/0.874</b> |
|                               | Noise2VST <sup>†</sup> (ours) | <u>32.83/0.891</u>  | <u>31.26/0.884</u> | <u>31.81/0.872</u> |
| Gaussian $\sigma \in [5, 50]$ | Baseline, N2C [29]            | 33.08/0.887         | 31.40/0.871        | 32.41/0.883        |
|                               | CBM3D [6]                     | 32.02/0.860         | 30.56/0.847        | 30.94/0.849        |
|                               | N2V [13]                      | 31.72/0.863         | 30.39/0.855        | 30.24/0.843        |
|                               | Nr2N [17]                     | 32.17/0.868         | 30.93/0.862        | 30.87/0.852        |
|                               | S2S [20]                      | 31.37/0.860         | 29.87/0.841        | 29.97/0.849        |
|                               | DBSN [23]                     | 30.38/0.826         | 28.34/0.788        | 29.49/0.814        |
|                               | SSDN [14]                     | 32.40/0.870         | 30.95/0.861        | 31.21/0.855        |
|                               | R2R [18]                      | 31.50/0.850         | 30.56/0.855        | 30.84/0.850        |
|                               | NBR2NBR [11]                  | 32.10/0.870         | 30.73/0.861        | 31.05/0.858        |
|                               | B2UNB [22]                    | 32.34/0.872         | 30.86/0.861        | 31.14/0.857        |
|                               | DCD-Net [32]                  | 32.35/0.872         | 31.09/0.866        | 31.09/0.855        |
|                               | SST-GP [24]                   | 31.78/0.880         | 31.12/0.869        | 31.38/0.871        |
|                               | Noise2VST (ours)              | <b>32.93/0.882</b>  | <b>31.27/0.869</b> | <b>32.09/0.872</b> |
|                               | Noise2VST <sup>†</sup> (ours) | <u>32.88/0.881</u>  | <u>31.24/0.870</u> | <u>32.08/0.873</u> |
| Poisson $\lambda = 30$        | Baseline, N2C + GAT [15, 29]  | 32.22/0.884         | 30.59/0.872        | 31.07/0.865        |
|                               | CBM3D + GAT [6, 15]           | 30.53/0.856         | 29.18/0.842        | 29.44/0.837        |
|                               | N2V [13]                      | 31.18/0.864         | 29.88/0.858        | 29.79/0.841        |
|                               | Nr2N [17]                     | 29.43/0.775         | 28.29/0.764        | 28.63/0.778        |
|                               | ZS-N2N [16]                   | 29.06/0.775         | 28.15/0.782        | 27.97/0.763        |
|                               | S2S [20]                      | 30.31/0.857         | 28.93/0.840        | 28.84/0.839        |
|                               | DBSN                          | 30.07/0.827         | 28.19/0.790        | 29.16/0.814        |
|                               | SSDN [14]                     | 31.67/0.874         | 30.25/0.866        | 30.47/0.855        |
|                               | R2R [18]                      | 30.50/0.801         | 29.47/0.811        | 29.53/0.801        |
|                               | NBR2NBR [11]                  | 31.44/0.870         | 30.10/0.863        | 30.29/0.853        |
|                               | B2UNB [22]                    | 31.64/0.871         | 30.25/0.862        | 30.46/0.852        |
|                               | DCD-Net [32]                  | 31.60/0.870         | 30.22/0.865        | 30.41/0.855        |
|                               | SST-GP [24]                   | 31.99/0.879         | <b>30.84/0.897</b> | 30.87/0.867        |
|                               | Noise2VST (ours)              | <b>32.19/0.883</b>  | 30.55/0.871        | <b>30.99/0.860</b> |
|                               | Noise2VST <sup>†</sup> (ours) | <u>32.13/0.882</u>  | <u>30.52/0.871</u> | <u>30.98/0.861</u> |
| Poisson $\lambda \in [5, 50]$ | Baseline, N2C + GAT [15, 29]  | 31.63/0.865         | 29.92/0.850        | 30.66/0.854        |
|                               | CBM3D + GAT [5, 15]           | 29.40/0.836         | 28.22/0.815        | 28.51/0.817        |
|                               | N2V [13]                      | 30.55/0.844         | 29.46/0.844        | 29.44/0.831        |
|                               | Nr2N [17]                     | 30.31/0.812         | 29.45/0.821        | 29.40/0.812        |
|                               | S2S [20]                      | 29.06/0.834         | 28.15/0.817        | 28.83/0.841        |
|                               | DBSN                          | 29.60/0.811         | 27.81/0.771        | 28.72/0.800        |
|                               | SSDN [14]                     | 30.88/0.850         | 29.57/0.841        | 28.94/0.808        |
|                               | R2R [18]                      | 29.14/0.732         | 28.68/0.771        | 28.77/0.765        |
|                               | NBR2NBR [11]                  | 30.86/0.855         | 29.54/0.843        | 29.79/0.838        |
|                               | B2UNB [22]                    | 31.07/0.857         | <u>29.92/0.852</u> | 30.10/0.844        |
|                               | DCD-Net [32]                  | 31.00/0.857         | <b>29.99/0.855</b> | 29.99/0.843        |
|                               | SST-GP [24]                   | 31.39/ <b>0.872</b> | 29.96/0.853        | 30.22/0.848        |
|                               | Noise2VST (ours)              | <b>31.60/0.865</b>  | 29.89/0.849        | <b>30.60/0.850</b> |
|                               | Noise2VST <sup>†</sup> (ours) | <u>31.51/0.862</u>  | <u>29.84/0.848</u> | <u>30.57/0.850</u> |

Table 1. PSNR(dB)/SSIM denoising results on synthetic datasets in sRGB space. The highest PSNR(dB)/SSIM among unsupervised denoising methods is highlighted in **bold**, while the second is underlined.

| Method | BM3D [5]            | DBSN [23]   | N2V [13]    | B2UNB [22]  | FBI-D (DND) [4] | Noise2VST (ours)   |
|--------|---------------------|-------------|-------------|-------------|-----------------|--------------------|
| DND    | 47.53/ <u>0.976</u> | 45.41/0.969 | 45.87/0.964 | 45.87/0.964 | 47.53/0.971     | <b>47.94/0.978</b> |

Table 2. PSNR(dB)/SSIM denoising results on Darmstadt Noise Dataset (DND) raw data [19].

## B. Display of the learned VST

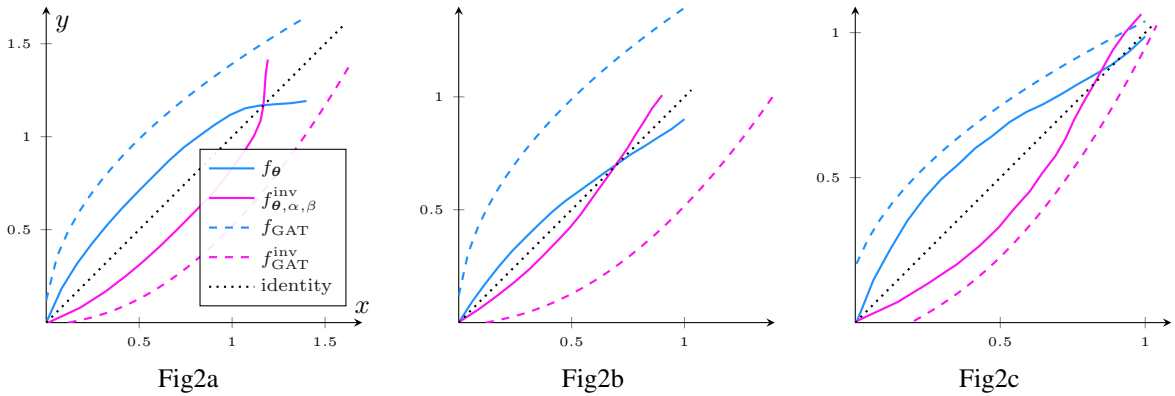

Figure 1. GAT versus learned VST by the proposed algorithm for Figure 2 of the paper.

### C. Ablation study on the number of parameters

Figure 2 presents the results of an ablation study on the number of learnable parameters for Noise2VST. As expected, increasing the number of parameters leads to improved PSNR, though the performance gains begin to plateau beyond a hundred parameters. Our choice of 128 (+ 2) parameters is thus appropriate.

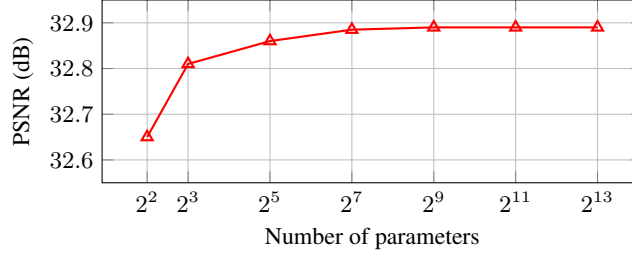

Figure 2. PSNR (in dB) vs. number of parameters (*i.e.*, number of knots for the spline  $f_\theta$ ) on the testing set Confocal Fish [30].

### D. Why can the noise level $\sigma$ and the parameter $\theta_1$ be fixed?

Let  $D$  be a non-blind denoiser, assumed to be normalization-equivariant [10]:

$$\forall (z, \sigma) \in \mathbb{R}^N \times \mathbb{R}_{>0}, \forall \lambda \in \mathbb{R}_{>0}, \forall \mu \in \mathbb{R}, \quad D(\lambda z + \mu \mathbf{1}, \lambda \sigma) = \lambda D(z, \sigma) + \mu \mathbf{1}, \quad (1)$$

Note that a denoiser  $D$  can always be constrained to be normalization-equivariant by considering the application  $\mathcal{T}^{\text{inv}} \circ D \circ \mathcal{T}$  with:

$$\mathcal{T} : (z, \sigma) \mapsto \left( \frac{z - z_{\min}}{z_{\max} - z_{\min}}, \frac{\sigma}{z_{\max} - z_{\min}} \right) \text{ and } \mathcal{T}^{\text{inv}} : z \mapsto (z_{\max} - z_{\min})z + z_{\min}, \quad (2)$$

(see elements of proof in [10]). The following proposition states that the noise level  $\sigma$  can be arbitrarily set to  $\sigma_0 = 25/255$  and the parameter  $\theta_1$  to 0 without loss of generality.

**Proposition 1.** *Let  $z \in \mathbb{R}^N$ ,  $\theta \in \mathbb{R}^n$ ,  $\alpha, \beta \in \mathbb{R}$  and  $\sigma > 0$ . There exists  $\alpha', \beta' \in \mathbb{R}$  and  $\theta' \in \mathbb{R}^n$  with  $\theta'_1 = 0$  such that:*

$$f_{\theta, \alpha, \beta}^{\text{inv}}(D(f_\theta(z), \sigma)) = f_{\theta', \alpha', \beta'}^{\text{inv}}(D(f_{\theta'}(z), \sigma_0)).$$

*Proof.* Let  $z \in \mathbb{R}^N$ ,  $\theta \in \mathbb{R}^n$ ,  $\alpha, \beta \in \mathbb{R}$  and  $\sigma > 0$ . By normalization-equivariance of the denoiser  $D$ :

$$f_{\theta, \alpha, \beta}^{\text{inv}}(D(f_\theta(z), \sigma)) = f_{\theta, \alpha, \beta}^{\text{inv}}\left(\frac{\sigma}{\sigma_0} D\left(\frac{\sigma_0}{\sigma} f_\theta(z) - \frac{\sigma_0}{\sigma} f_\theta(z_{\min}) \mathbf{1}, \sigma_0\right) + f_\theta(z_{\min}) \mathbf{1}\right).$$

But it is easy to see that there exists  $\theta' \in \mathbb{R}^n$  with  $\theta'_1 = 0$  such that:

$$f_{\theta'}(z) = \frac{\sigma_0}{\sigma} f_\theta(z) - \frac{\sigma_0}{\sigma} f_\theta(z_{\min}) \mathbf{1}.$$

Its algebraic inverse is:

$$f_{\theta'}^{-1}(z) = f_\theta^{-1}\left(\frac{\sigma}{\sigma_0} z + f_\theta(z_{\min}) \mathbf{1}\right),$$

and, for  $\alpha' = \alpha \frac{\sigma}{\sigma_0}$  and  $\beta' = \alpha f_\theta(z_{\min}) + \beta$ , we have:

$$f_{\theta', \alpha', \beta'}^{\text{inv}}(z) = f_{\theta'}^{-1}(z) + \alpha' z + \beta' \mathbf{1} = f_\theta^{-1}\left(\frac{\sigma}{\sigma_0} z + f_\theta(z_{\min}) \mathbf{1}\right) + \alpha' z + \beta' \mathbf{1} = f_{\theta, \alpha, \beta}^{\text{inv}}\left(\frac{\sigma}{\sigma_0} z + f_\theta(z_{\min}) \mathbf{1}\right).$$

Finally,  $f_{\theta, \alpha, \beta}^{\text{inv}}(D(f_\theta(z), \sigma)) = f_{\theta', \alpha', \beta'}^{\text{inv}}(D(f_{\theta'}(z), \sigma_0)).$

□

Table 3 experimentally confirms what was theoretically proven: the noise level  $\sigma$  and the parameter  $\theta_1$  can be fixed during training.

| $\theta_1 \backslash \sigma$ | $\sigma = 15/255$ | $\sigma = 25/255$ | $\sigma = 50/255$ | Learned |
|------------------------------|-------------------|-------------------|-------------------|---------|
| $\theta_1 = 0$               | 32.882            | 32.882            | 32.880            | 32.878  |
| Learned                      | 32.880            | 32.883            | 32.879            | 32.881  |

Table 3. PSNR(dB) results of Noise2VST with different combinations of  $\theta_1$  and  $\sigma$  on the testing set Confocal Fish.

## E. Choice of the Gaussian denoiser

### E.1. Blind denoisers are helpless for real-world noise

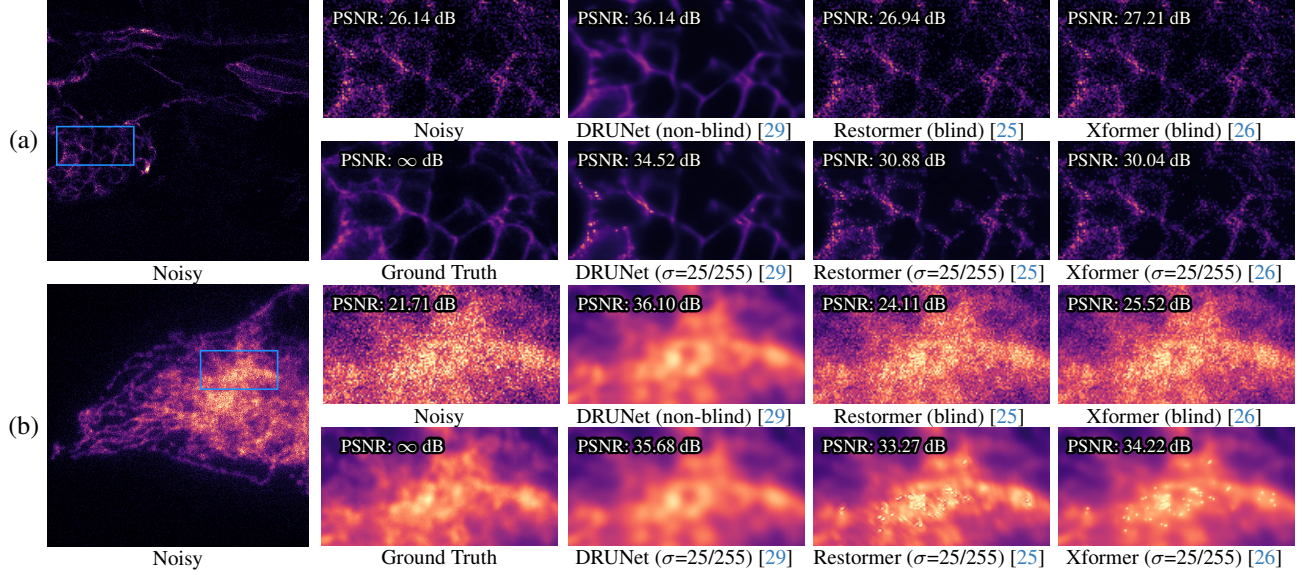

Figure 3. Qualitative real-world image denoising results within the proposed Noise2VST framework for different types of neural networks. (a): image from FMD dataset [30], (b): image from W2S dataset [31]. Only the non-blind denoising network (*i.e.*, with a noise level map as additional input [28, 29]) is able to process the noise correctly, a phenomenon already observed in [28] for real-world noise. The pre-trained weights are taken from [10, 25, 26, 29].

### E.2. Noise2VST can handle a wide range of (non-blind) denoisers

Non-blind Gaussian denoisers are recommended within our framework due to their better generalization abilities. We tested our method with three others:

- FDnCNN: the unpublished non-blind version of DnCNN,
- GS-DRUNet [12]: a “gradient step” denoiser,
- NL-Ridge [9]: a “traditional” denoiser written in PyTorch (thus supporting automatic differentiation).

Table 4 presents the experimental results, which highlight the ability of Noise2VST to handle a wide range of denoisers.

| $\begin{matrix} \text{Inference} \\ \text{Training} \end{matrix}$ | Same as training | DRUNet |
|-------------------------------------------------------------------|------------------|--------|
| DRUNet [29]                                                       | 32.88            | 32.88  |
| FFDNet [28]                                                       | 32.62            | 32.88  |
| FDnCNN [27]                                                       | 32.59            | 32.88  |
| GS-DRUNet [12]                                                    | 32.87            | 32.88  |
| NL-Ridge [9]                                                      | 31.42            | 32.71  |

Table 4. PSNR (in dB) results of Noise2VST with different combinations of Gaussian denoisers on the testing set Confocal Fish [30].

## F. How does the learned VST stabilize the variance in the case of synthetic Poisson noise?

In this experiment, we artificially generate noisy images by adding Poisson noise to clean images. The noise model is:

$$z_i = \mathcal{P}(\lambda s_i) / \lambda$$

where  $\lambda$  controls to level of noise. Giving the information of  $\lambda$  to GAT [15], we know that that the variance of the random variable  $f_{\text{GAT}}(z_i)$  is approximately constant, whatever the value of  $s_i$ . But what about the learned VST  $f_\theta$ ? Figure 4 shows that, even though the learned VST is less precise than GAT in stabilizing variance, they do achieve almost the same performance for image denoising in the end. This surprising phenomenon can be attributed to the fact that powerful denoisers such as [28, 29] can adapt to a noise level which was slightly over or under-estimated, without much consequences with regard to the outcome. Of course, it is recommended to use GAT for synthetic Poisson noise over the learned VST when the oracle parameter  $\lambda$  is given. However, as shown in the paper, the proposed method finds its true interest in the case of real noise.

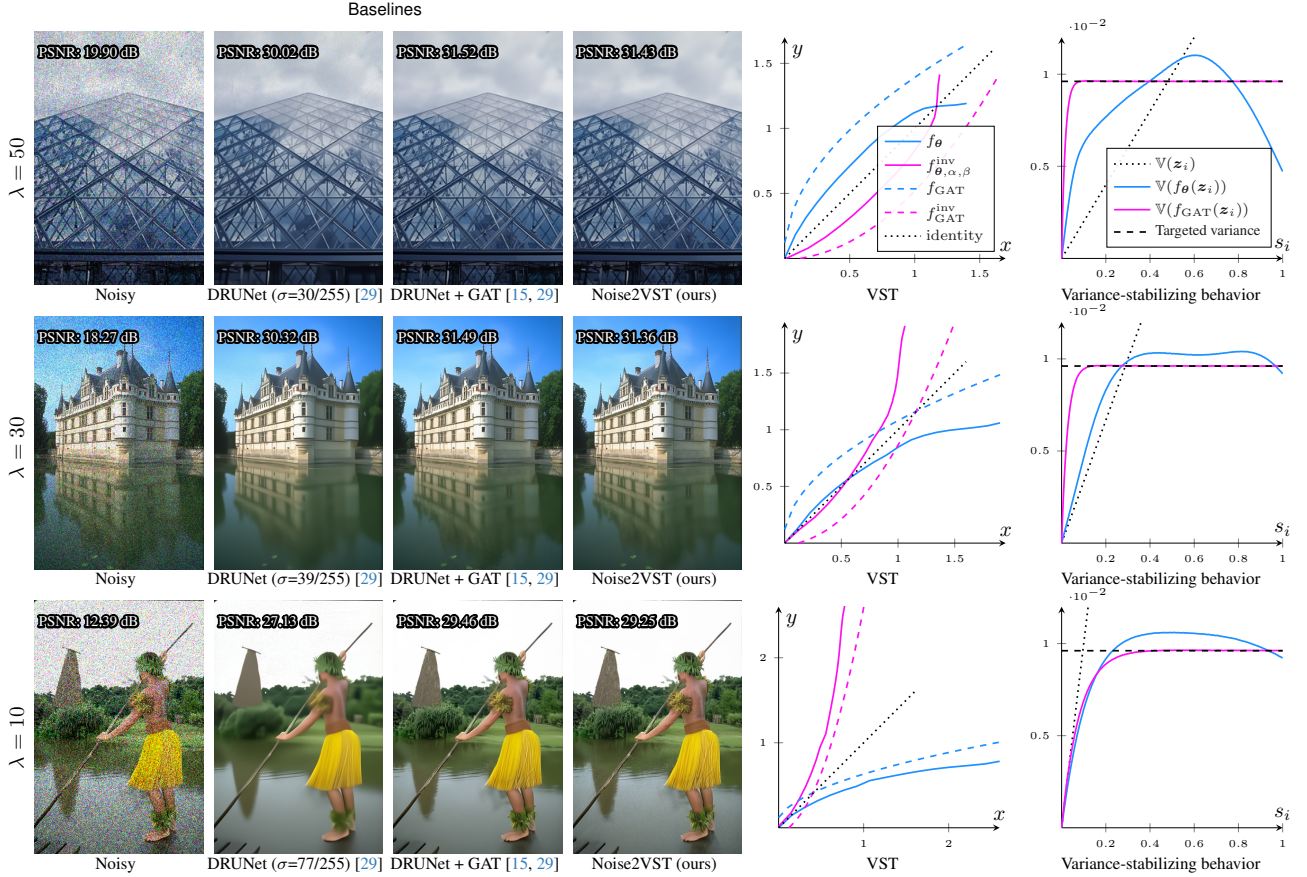

Figure 4. GAT versus learned VST for synthetic Poisson noise. The learned transform  $f_\theta$  is less precise than  $f_{\text{GAT}}$  in stabilizing the variance of synthetic Poisson noise with parameter  $\lambda$  (assuming that GAT knows the oracle parameter  $\lambda$ ) but the consequences in terms of denoising performance are very limited. As a baseline, we also compare with the case where no VST is applied (the best noise level  $\sigma$  is shown in each case).



## G. How does the learned VST stabilize the variance in the case of synthetic Rayleigh noise?

In this experiment, we artificially generate noisy images by adding Rayleigh noise to clean images. The noise model is:

$$z_i = \sqrt{\frac{2}{\pi}} \text{Rayleigh}(s_i), \quad (3)$$

where the multiplicative constant is added to guarantee that  $\mathbb{E}(z_i) = s_i$  (zero-mean noise). Interestingly, there exists transformations that stabilize exactly the variance, namely:

$$f_{\text{exact}} : z \mapsto \frac{\sqrt{24}}{\pi} \log(z) + c. \quad (4)$$

where  $c \in \mathbb{R}$  can be any constant. This is because the log-Rayleigh distribution [21] has a variance of  $\pi^2/24$ , which does not depend on its parameter  $s_i$ . Note however that, contrary to mixed Poisson-Gaussian noise,  $f_{\text{exact}}(z_i)$  is not close to a normal distribution. The exact unbiased inverse [15] is given by the implicit mapping  $\mathbb{E}[f_{\text{exact}}(z)|s] \mapsto s$ , where  $z$  denotes the random variable following (3). According to [21],  $\mathbb{E}[f_{\text{exact}}(z)|s] = \frac{\sqrt{24}}{\pi}(\log(s) + (\log(2) + \log(2/\pi) - \gamma)/2) + c$ , hence:

$$f_{\text{exact}}^{\text{inv}} : z \mapsto \exp\left(\frac{\gamma - \log(2) - \log(2/\pi)}{2}\right) \exp\left(\frac{\pi}{\sqrt{24}}(z - c)\right). \quad (5)$$

where  $\gamma$  is the Euler constant defined by  $-\int_0^{+\infty} \log(x) \exp(-x) dx$ .

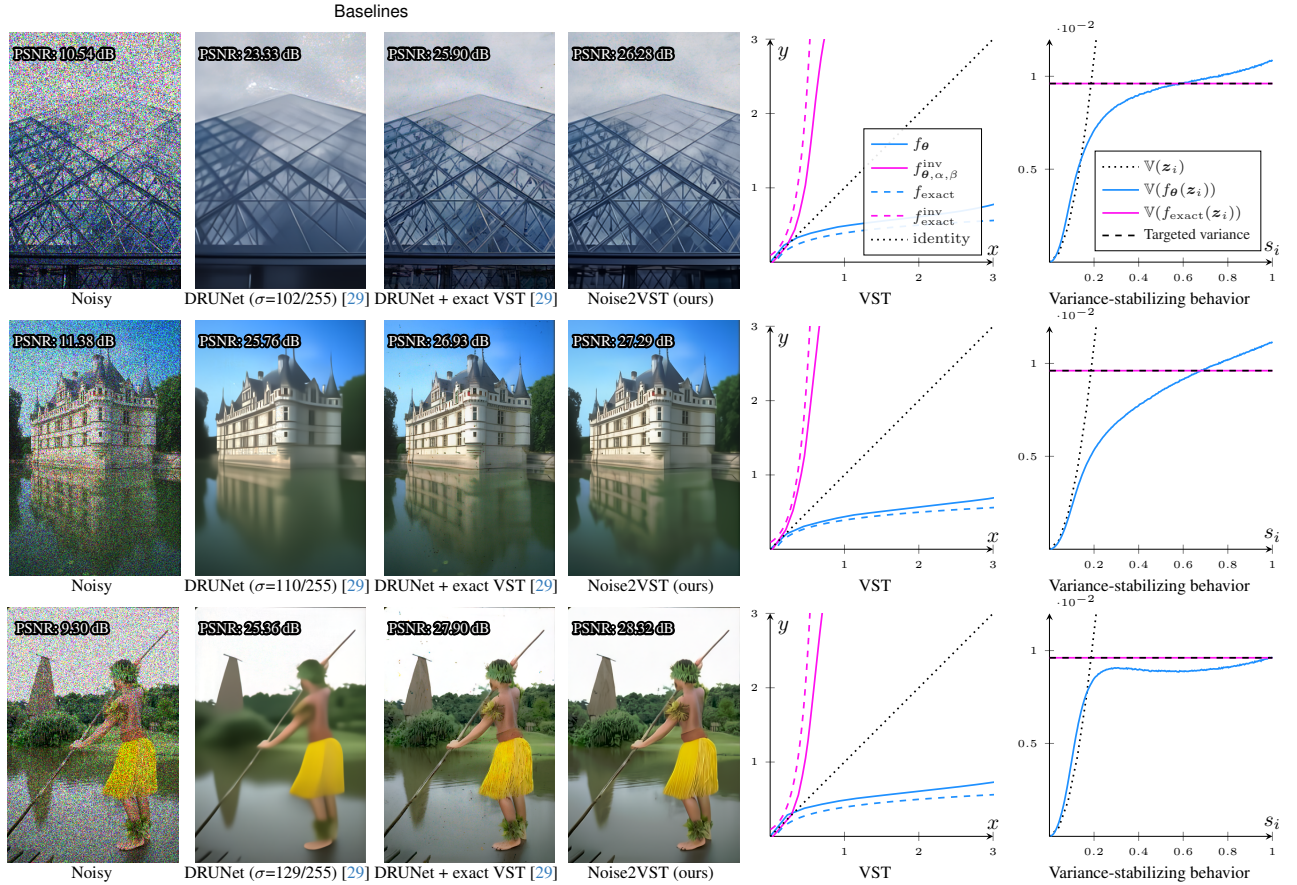

Figure 5. Exact versus learned VST for synthetic Rayleigh noise. The learned transform  $f_{\theta}$  is less precise than  $f_{\text{exact}}$  in stabilizing the variance of synthetic Rayleigh noise but it actually gives slightly better results. As a baseline, we also compare with the case where no VST is applied (the best noise level  $\sigma$  is shown in each case).

## H. On the benefit of constraining the inverse transform to be closed to the algebraic one

|                                          | Inverse VST         | Kodak [8]<br>(Poisson $\lambda=30$ ) | FMD [30]<br>Confocal Fish | SIDD [1]<br>Validation |
|------------------------------------------|---------------------|--------------------------------------|---------------------------|------------------------|
| $g_{\theta}$                             | (unconstrained)     | 31.68/0.866                          | <b>32.91/0.906</b>        | 50.92/0.991            |
| $f_{\theta}^{-1}$                        | (algebraic inverse) | 31.95/0.878                          | 32.37/0.896               | 51.59/0.991            |
| $f_{\theta, \alpha, \beta}^{\text{inv}}$ | (proposed)          | <b>32.19/0.883</b>                   | <u>32.88/0.905</u>        | <b>51.66/0.992</b>     |

Table 5. Ablation study: PSNR(dB)/SSIM denoising results of Noise2VST depending on the nature of the inverse transform.

## I. On the benefit of a model-free VST

In the proposed framework, the VST is searched among the family of continuous piecewise linear (CPWL) functions which allows high flexibility. But what if the VST is searched among the family of the generalized Anscombe transforms (GAT) instead, parameterized by only two positive parameters  $a$  and  $b$ ? More precisely, the direct and inverse transforms, parameterized by  $a$  and  $b$ , are given by:

$$f_{\text{GAT}} : z \mapsto \frac{2}{a} \sqrt{\max \left( az + \frac{3}{8}a^2 + b, 0 \right)}, \quad (6)$$

and

$$f_{\text{GAT}}^{\text{inv}} : z \mapsto a \left( \frac{1}{4}z^2 - \frac{1}{8} + \frac{1}{4}\sqrt{\frac{3}{2}}z^{-1} - \frac{11}{8}z^{-2} + \frac{5}{8}\sqrt{\frac{3}{2}}z^{-3} \right) - \frac{b}{a}, \quad (7)$$

respectively. Note that the inverse transform  $f_{\text{GAT}}^{\text{inv}}$  is the closed-form approximation of the unbiased inverse transform recommended by [15]. Table 6 shows that it is possible to use the proposed framework to find the GAT parameters in the case of synthetic noise. However, in real-world noise conditions, the proposed model-free VST achieves better results than the learned model-based VST, which assumes a mixed Poisson-Gaussian model, perhaps not entirely accurate. Nevertheless, it is worth noticing that the estimation of parameters  $a$  and  $b$  within our framework is still better than the parameters provided by the authors of the FMD dataset [30] or the ones estimated by the zero-shot method [7] for W2S dataset [31] (see Table 2 and 3 of the paper). Finally, note that for real-noise experiments, we utilized the raw W2S dataset [31] rather than the normalized version provided by the authors, as normalization can alter the noise distribution in a way that may negatively impact GAT.

|                  | Model for VST | Number of parameters | Kodak [8]<br>(Poisson $\lambda=30$ ) | FMD [30]<br>Confocal Fish | FMD [30]<br>Confocal Mice | W2S ch0 [31]<br><i>avg l</i> |
|------------------|---------------|----------------------|--------------------------------------|---------------------------|---------------------------|------------------------------|
| $f_{\text{GAT}}$ | (model-based) | 2                    | <b>32.19/0.883</b>                   | 32.78/0.897               | 38.23/0.965               | 35.04                        |
| $f_{\theta}$     | (model-free)  | 130                  | <b>32.19/0.883</b>                   | <b>32.88/0.905</b>        | <b>38.27/0.965</b>        | <b>35.65</b>                 |

Table 6. Ablation study: PSNR(dB)/SSIM denoising results of Noise2VST depending on the model for the VST.

## J. Limitations

There are obviously no performance guarantees when the noise properties deviate from our assumptions, namely the noise is *zero-mean*, *spatially independent* and *Gaussianizable* (i.e. there exists a transformation from the input noise distribution to a Gaussian-like one). Figure 6 shows two artificial (and non-realistic) examples in which Noise2VST encounters difficulties due to the out-of-distribution nature of the noise. We notice that the spatial independence of noise appears to be the most crucial property of all. However, we would like to emphasize that the noise assumptions underlying Noise2VST are already quite broad and have proven to be sufficient for most applications, especially in fluorescence microscopy. Furthermore, these are the same assumptions commonly made in the literature, aligning with works such as Noise2Void [13], Noise2Self [3], and their variants [11, 16, 18, 20, 22].

Of course, this is not specific to Noise2VST. For example, the traditional Anscombe transform [2] also has troubles when the noise assumption (namely Poisson noise) does not align with the input noise distribution (see Fig. 7).

## References

- [1] Abdelrahman Abdelhamed, Stephen Lin, and Michael S. Brown. A high-quality denoising dataset for smartphone cameras. In *IEEE/CVF Conference on Computer Vision and Pattern Recognition (CVPR)*, 2018. 6



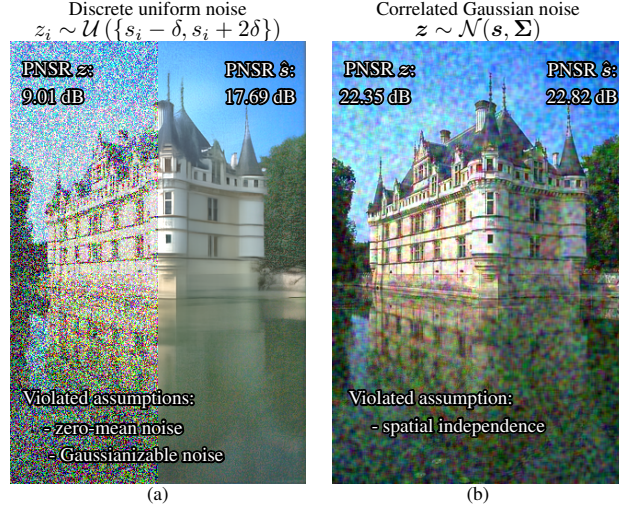

Figure 6. Examples of out-of-distribution noises for Noise2VST.

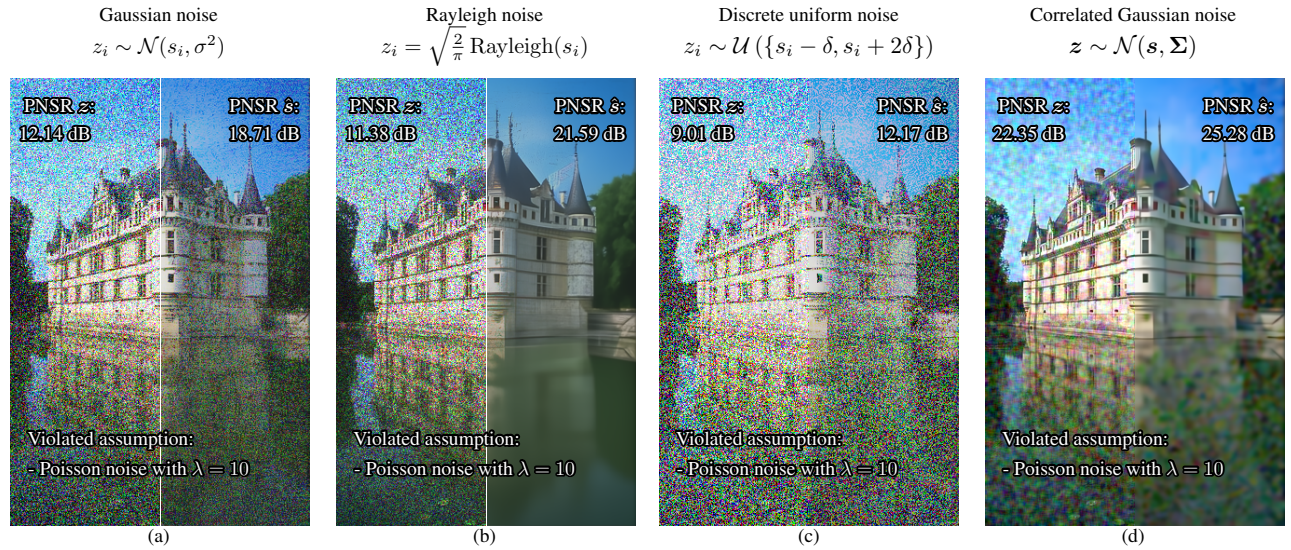

Figure 7. Examples of out-of-distribution noises for a model-based VST (Anscombe transform [2]).

- [2] Francis J. Anscombe. The transformation of Poisson, binomial and negative-binomial data. *Biometrika*, 35(3/4):246–254, 1948. 6, 7
- [3] Joshua Batson and Loic Royer. Noise2Self: Blind denoising by self-supervision. In *International Conference on Machine Learning (ICML)*, pages 524–533, 2019. 6
- [4] Jaeseok Byun, Sungmin Cha, and Taesup Moon. FBI-denoiser: Fast blind image denoiser for Poisson-Gaussian noise. In *IEEE/CVF Conference on Computer Vision and Pattern Recognition (CVPR)*, pages 5768–5777, 2021. 1
- [5] Kostadin Dabov, Alessandro Foi, Vladimir Katkovnik, and Karen Egiazarian. Image denoising by sparse 3-D transform-domain collaborative filtering. *IEEE Transactions on Image Processing*, 16(8):2080–2095, 2007. 1
- [6] Kostadin Dabov, Alessandro Foi, Vladimir Katkovnik, and Karen Egiazarian. Color image denoising via sparse 3D collaborative filtering with grouping constraint in luminance-chrominance space. In *IEEE International Conference on Image Processing (ICIP)*, pages I–313. IEEE, 2007. 1
- [7] Alessandro Foi, Mejdi Trimeche, Vladimir Katkovnik, and Karen Egiazarian. Practical Poissonian-Gaussian noise modeling and fitting for single-image raw-data. *IEEE Transactions on Image Processing*, 17(10):1737–1754, 2008. 6
- [8] Rich Franzen. Kodak lossless true color image suite. source: <http://r0k.us/graphics/kodak>, 4(2):9, 1999. 6
- [9] Sébastien Herbretreau and Charles Kervrann. Towards a unified view of unsupervised non-local methods for image denoising: The NL-Ridge approach. In *IEEE International Conference on Image Processing (ICIP)*, pages 3376–3380, 2022. 3

- [10] Sébastien Herbreteau, Emmanuel Moebel, and Charles Kervrann. Normalization-equivariant neural networks with application to image denoising. In *Advances in Neural Information Processing Systems (NeurIPS)*, pages 5706–5728, 2023. 2, 3
- [11] Tao Huang, Songjiang Li, Xu Jia, Huchuan Lu, and Jianzhuang Liu. Neighbor2Neighbor: Self-supervised denoising from single noisy images. In *IEEE/CVF Conference on Computer Vision and Pattern Recognition (CVPR)*, pages 14781–14790, 2021. 1, 6
- [12] S. Hurault, A. Leclaire, and N. Papadakis. Gradient step denoiser for convergent plug-and-play. In *International Conference on Learning Representations (ICLR)*, 2022. 3
- [13] Alexander Krull, Tim-Oliver Buchholz, and Florian Jug. Noise2Void - Learning denoising from single noisy images. In *IEEE/CVF Conference on Computer Vision and Pattern Recognition (CVPR)*, pages 2124–2132, 2019. 1, 6
- [14] Samuli Laine, Tero Karras, Jaakko Lehtinen, and Timo Aila. High-quality self-supervised deep image denoising. In *Advances in Neural Information Processing Systems (NeurIPS)*, 2019. 1
- [15] Markku Makitalo and Alessandro Foi. Optimal inversion of the generalized Anscombe transformation for Poisson-Gaussian noise. *IEEE Transactions on Image Processing*, 22(1):91–103, 2012. 1, 4, 5, 6
- [16] Youssef Mansour and Reinhard Heckel. Zero-Shot Noise2Noise: Efficient image denoising without any data. In *IEEE/CVF Conference on Computer Vision and Pattern Recognition (CVPR)*, pages 14018–14027, 2023. 1, 6
- [17] Nick Moran, Dan Schmidt, Yu Zhong, and Patrick Coady. Noisier2Noise: Learning to denoise from unpaired noisy data. In *IEEE/CVF Conference on Computer Vision and Pattern Recognition (CVPR)*, pages 12061–12069, 2020. 1
- [18] Tongyao Pang, Huan Zheng, Yuhui Quan, and Hui Ji. Recorrupted-to-Recorrupted: Unsupervised deep learning for image denoising. In *IEEE/CVF Conference on Computer Vision and Pattern Recognition (CVPR)*, pages 2043–2052, 2021. 1, 6
- [19] Tobias Plötz and Stefan Roth. Benchmarking denoising algorithms with real photographs. In *IEEE/CVF Conference on Computer Vision and Pattern Recognition (CVPR)*, pages 2750–2759, 2017. 1
- [20] Yuhui Quan, Mingqin Chen, Tongyao Pang, and Hui Ji. Self2Self with dropout: Learning self-supervised denoising from single image. In *IEEE/CVF Conference on Computer Vision and Pattern Recognition (CVPR)*, pages 1887–1895, 2020. 1, 6
- [21] Bertrand Rivet, Laurent Girin, and Christian Jutten. Log-Rayleigh distribution: A simple and efficient statistical representation of log-spectral coefficients. *IEEE Transactions on Audio, Speech, and Language Processing*, 15(3):796–802, 2007. 5
- [22] Zejin Wang, Jiazheng Liu, Guoqing Li, and Hua Han. Blind2Unblind: Self-supervised image denoising with visible blind spots. In *IEEE/CVF Conference on Computer Vision and Pattern Recognition (CVPR)*, pages 2027–2036, 2022. 1, 6
- [23] Xiaohe Wu, Ming Liu, Yue Cao, Dongwei Ren, and Wangmeng Zuo. Unpaired learning of deep image denoising. In *European Conference on Computer Vision (ECCV)*, pages 352–368, 2020. 1
- [24] Rajeev Yasarla, Jeya Maria Jose Valanarasu, Vishwanath Sindagi, and Vishal M. Patel. Self-supervised denoising transformer with Gaussian process. In *IEEE/CVF Winter Conference on Applications of Computer Vision*, pages 1474–1484, 2024. 1
- [25] Syed Waqas Zamir, Aditya Arora, Salman Khan, Munawar Hayat, Fahad Shahbaz Khan, and Ming-Hsuan Yang. Restormer: Efficient transformer for high-resolution image restoration. In *IEEE/CVF Conference on Computer Vision and Pattern Recognition (CVPR)*, pages 5718–5729, 2022. 3
- [26] Jiale Zhang, Yulun Zhang, Jinjin Gu, Jiahua Dong, Linghe Kong, and Xiaokang Yang. Xformer: Hybrid X-shaped transformer for image denoising. In *International Conference on Learning Representations (ICLR)*, 2024. 3
- [27] Kai Zhang, Wangmeng Zuo, Yunjin Chen, Deyu Meng, and Lei Zhang. Beyond a Gaussian denoiser: Residual learning of deep CNN for image denoising. *IEEE Transactions on Image Processing*, 26(7):3142–3155, 2017. 3
- [28] Kai Zhang, Wangmeng Zuo, and Lei Zhang. FFDNet: Toward a fast and flexible solution for CNN-based image denoising. *IEEE Transactions on Image Processing*, 27(9):4608–4622, 2018. 3, 4
- [29] Kai Zhang, Yawei Li, Wangmeng Zuo, Lei Zhang, Luc Van Gool, and Radu Timofte. Plug-and-Play image restoration with deep denoiser prior. *IEEE Transactions on Pattern Analysis and Machine Intelligence*, 44(10):6360–6376, 2022. 1, 3, 4, 5
- [30] Yide Zhang, Yinhao Zhu, Evan Nichols, Qingfei Wang, Siyuan Zhang, Cody Smith, and Scott Howard. A Poisson-Gaussian denoising dataset with real fluorescence microscopy images. In *IEEE/CVF Conference on Computer Vision and Pattern Recognition (CVPR)*, pages 11710–11718, 2019. 2, 3, 6
- [31] Ruofan Zhou, Majed El Helou, Daniel Sage, Thierry Laroche, Arne Seitz, and Sabine Süsstrunk. W2S: Microscopy data with joint denoising and super-resolution for widefield to SIM mapping. In *European Conference on Computer Vision Workshops (ECCVW)*, 2020. 3, 6
- [32] Yunhao Zou, Chenggang Yan, and Ying Fu. Iterative denoiser and noise estimator for self-supervised image denoising. In *IEEE/CVF International Conference on Computer Vision (ICCV)*, pages 13265–13274, 2023. 1
